# Supplementary material for: Dissecting Tumor Antigens and Immune Subtypes of Glioma to Develop mRNA Vaccine
Source: PubMed Central journal article supplement (PMC8429949; doi:10.3389/fimmu.2021.709986), 2021-08-27

ANAX5 OS in TCGA (WHO II grade)

Strata + status=High (129) + status=Low (128)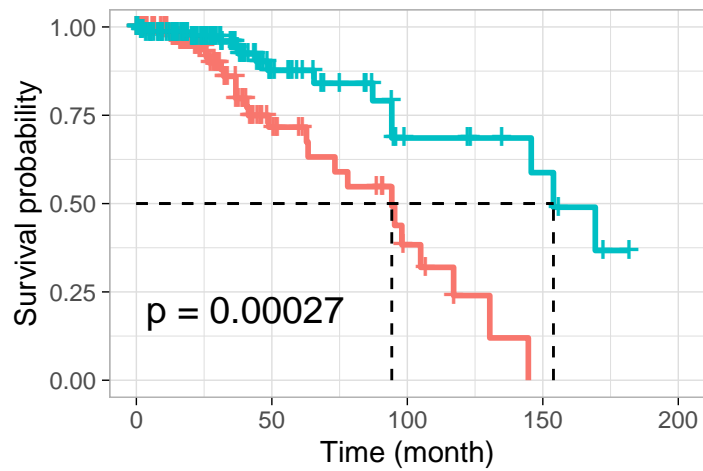

FKBP10 OS in TCGA (WHO II grade)

Strata + status=High (129) + status=Low (128)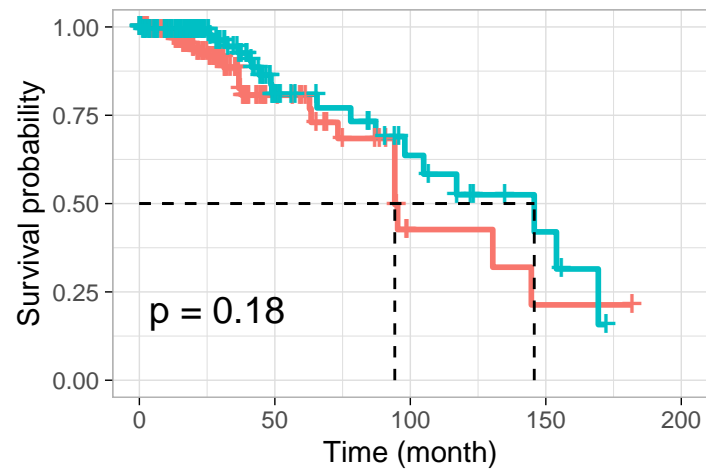

MSN OS in TCGA (WHO II grade)

Strata + status=High (129) + status=Low (128)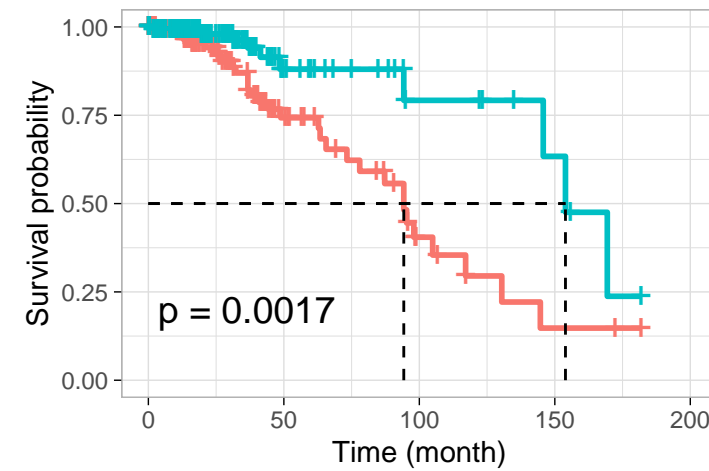

PYGL OS in TCGA (WHO II grade)

Strata + status=High (129) + status=Low (128)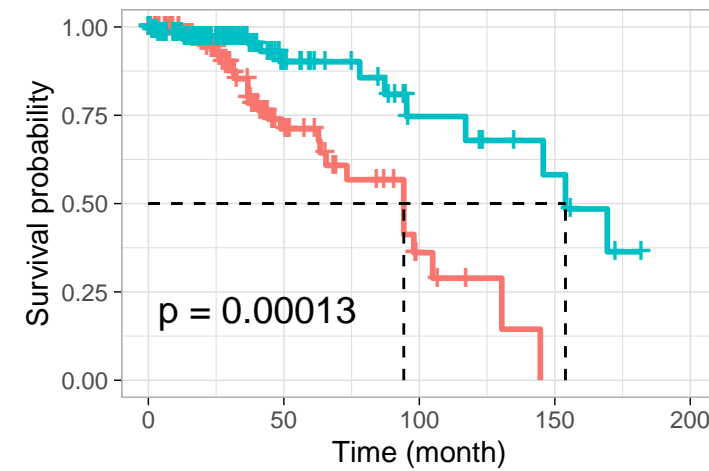

ANAX5 OS in TCGA (WHO III grade)

Strata + status=High (133) + status=Low (133)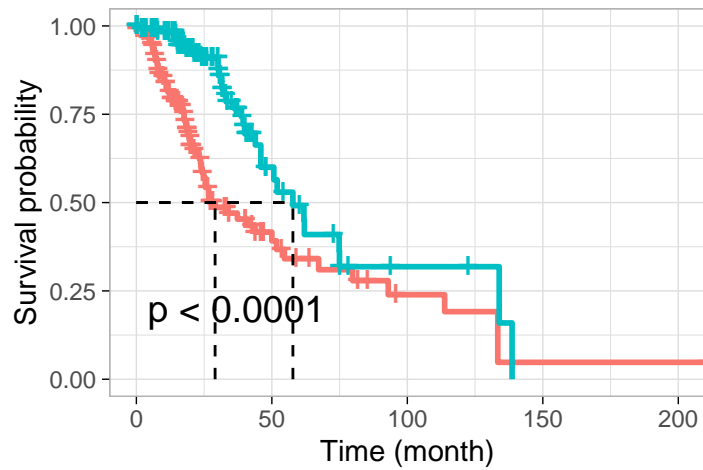

FKBP10 OS in TCGA (WHO III grade)

Strata + status=High (133) + status=Low (133)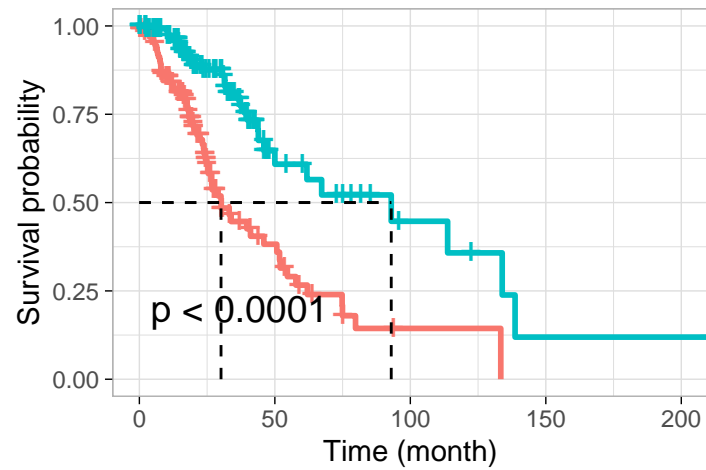

MSN OS in TCGA (WHO III grade)

Strata + status=High (133) + status=Low (133)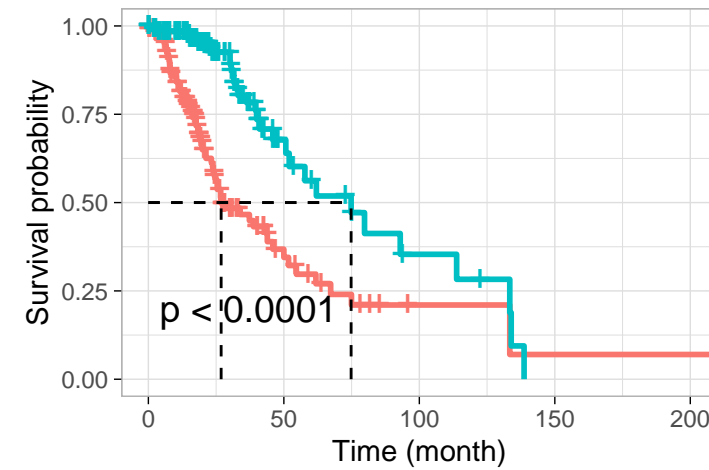

PYGL OS in TCGA (WHO III grade)

Strata + status=High (133) + status=Low (133)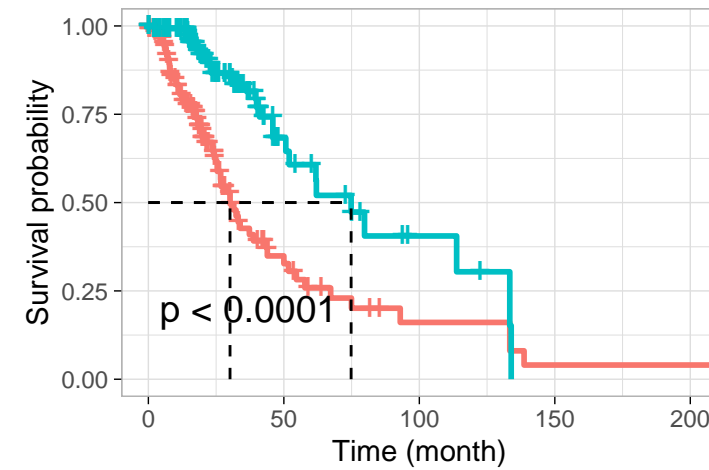

ANAX5 OS in TCGA (WHO IV grade)

Strata + status=High (84) + status=Low (83)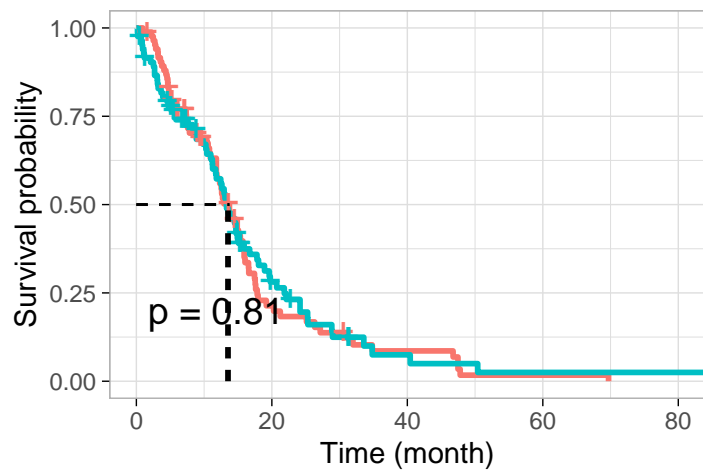

FKBP10 OS in TCGA (WHO IV grade)

Strata + status=High (84) + status=Low (83)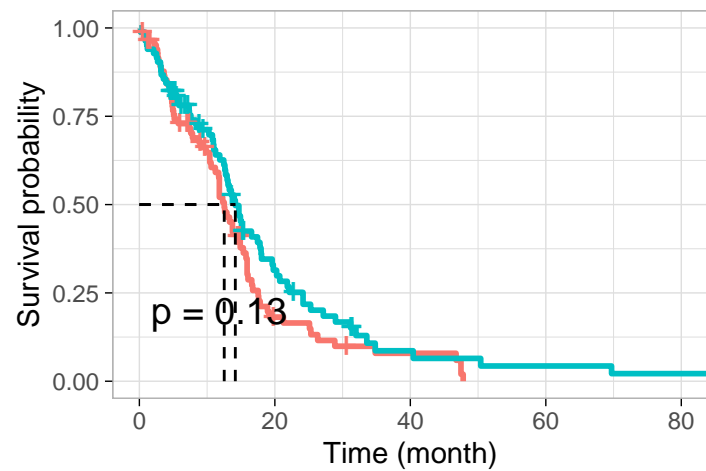

MSN OS in TCGA (WHO IV grade)

Strata + status=High (84) + status=Low (83)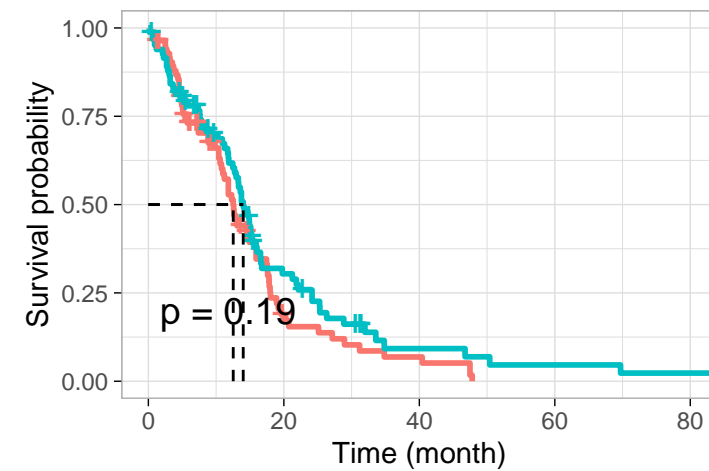

PYGL OS in TCGA (WHO IV grade)

Strata + status=High (84) + status=Low (83)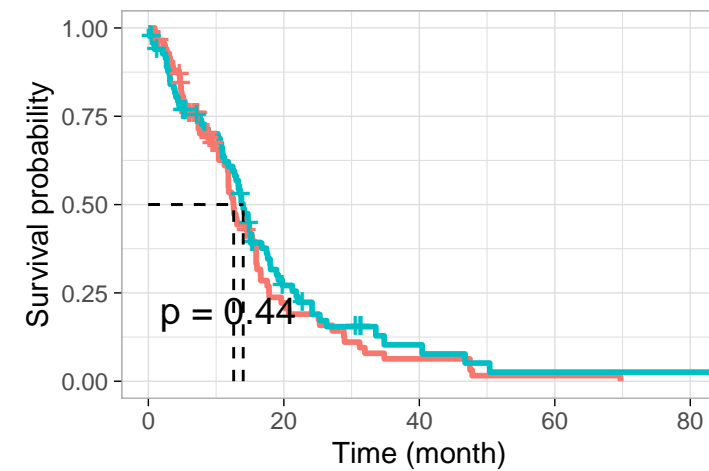

Supplement: Image_1.pdf [file Image_1.pdf]
