# Supplementary material for: Dissecting Tumor Antigens and Immune Subtypes of Glioma to Develop mRNA Vaccine
Source: PubMed Central journal article supplement (PMC8429949; doi:10.3389/fimmu.2021.709986), 2021-08-27

ANAX5 OS in TCGA (IS1)

Strata + status=High (82) + status=Low (81)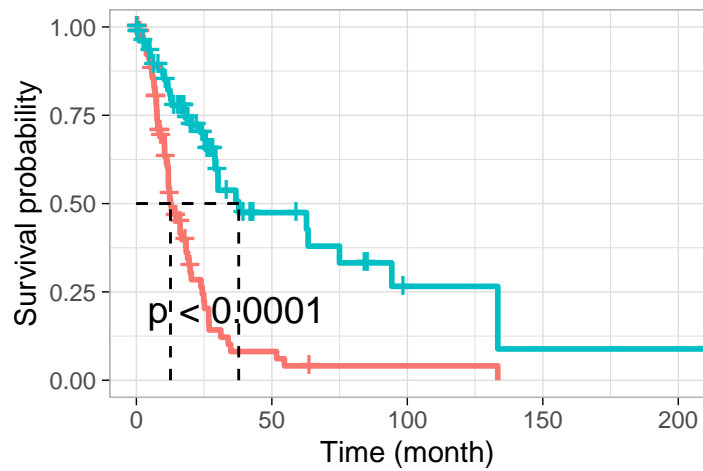

FKBP10 OS in TCGA (IS1)

Strata + status=High (82) + status=Low (81)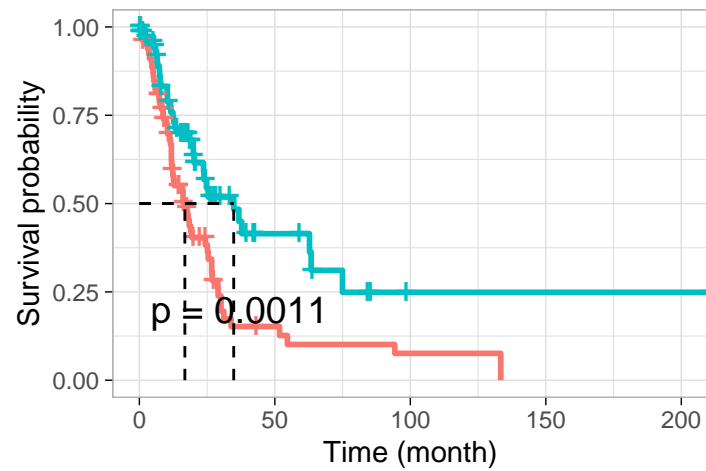

MSN OS in TCGA (IS1)

Strata + status=High (82) + status=Low (81)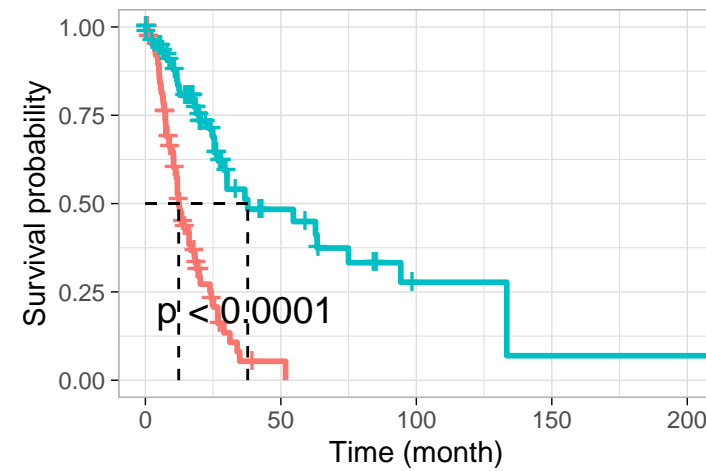

PYGL OS in TCGA (IS1)

Strata + status=High (82) + status=Low (81)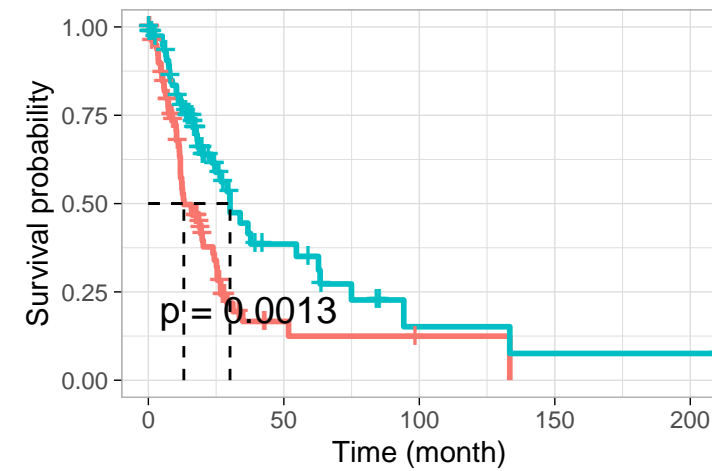

ANAX5 OS in TCGA (IS2)

Strata + status=High (169) + status=Low (169)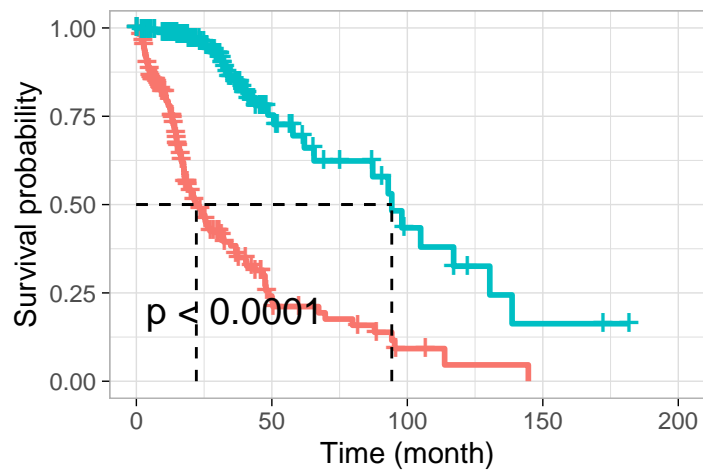

FKBP10 OS in TCGA (IS2)

Strata + status=High (169) + status=Low (169)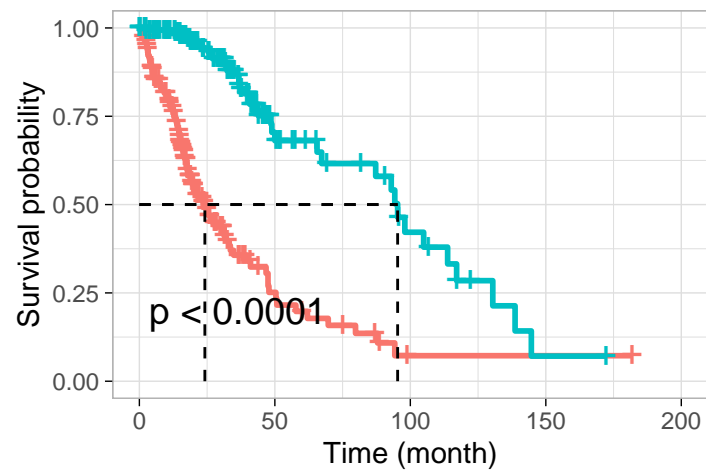

MSN OS in TCGA (IS2)

Strata + status=High (169) + status=Low (169)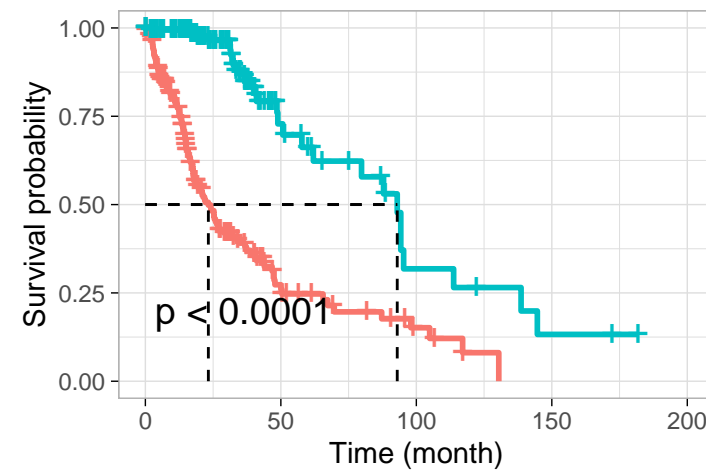

PYGL OS in TCGA (IS2)

Strata + status=High (169) + status=Low (169)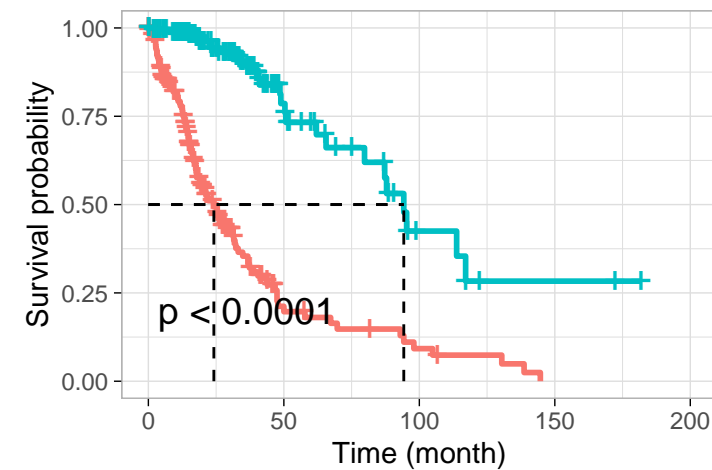

ANAX5 OS in TCGA (IS3)

Strata + status=High (95) + status=Low (94)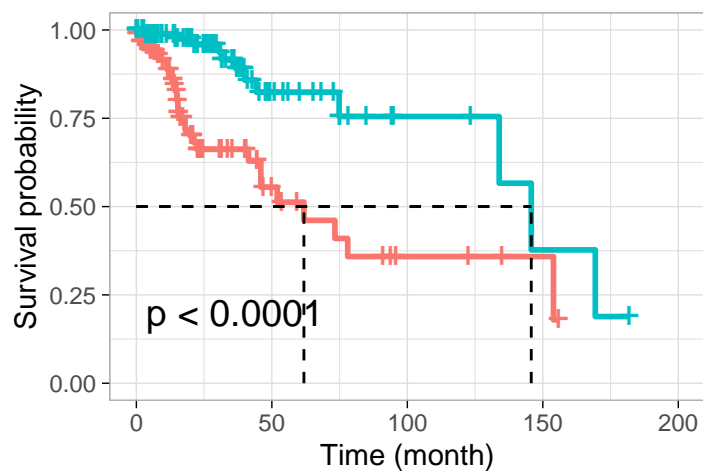

FKBP10 OS in TCGA (IS3)

Strata + status=High (95) + status=Low (94)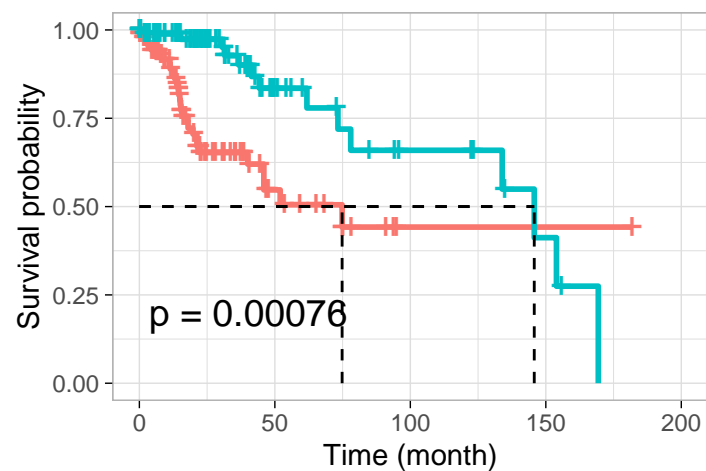

MSN OS in TCGA (IS3)

Strata + status=High (95) + status=Low (94)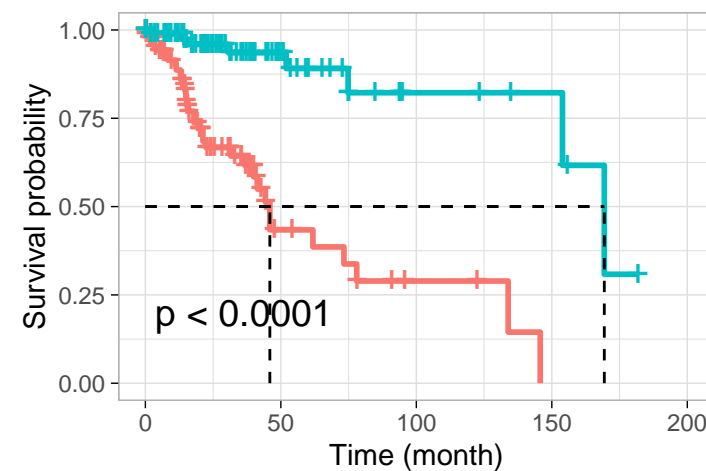

PYGL OS in TCGA (IS3)

Strata + status=High (95) + status=Low (94)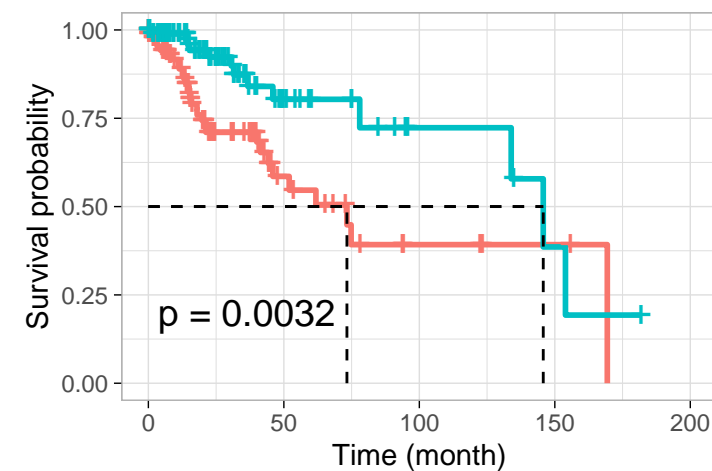

Supplement: Image_2.pdf [file Image_2.pdf]
