# Supplementary material for: Dissecting Tumor Antigens and Immune Subtypes of Glioma to Develop mRNA Vaccine
Source: PubMed Central journal article supplement (PMC8429949; doi:10.3389/fimmu.2021.709986), 2021-08-27

CGGA

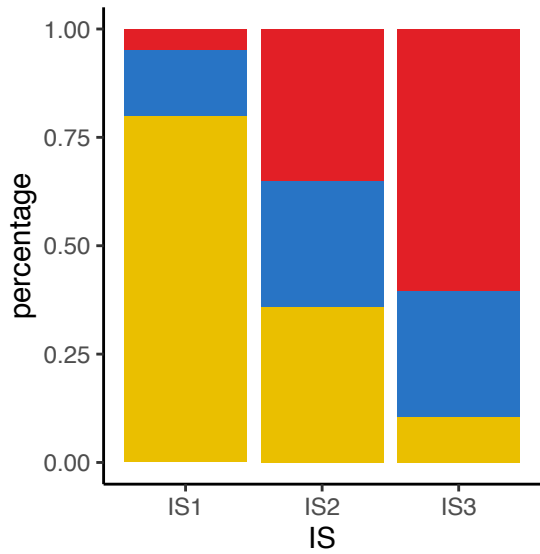

TCGA

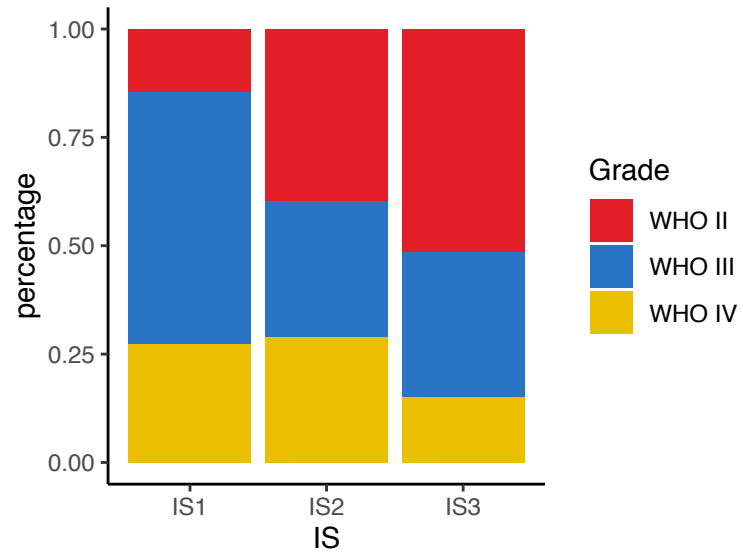

Supplement: Image_3.pdf [file Image_3.pdf]
